# Supplementary material for: Androgen Receptor Inhibitors in Patients With Nonmetastatic Castration-Resistant Prostate Cancer
Source: PubMed Central journal article supplement — JAMA Netw Open. 2024 Aug 27;7(8):e2429783. doi: 10.1001/jamanetworkopen.2024.29783 (PMC11350483; doi:10.1001/jamanetworkopen.2024.29783), 2024-08-27
Supplement: jamanetwopen-e2429783-s001.pdf [file jamanetwopen-e2429783-s001.pdf]

## Supplementary Online Content

George DJ, Morgans AK, Constantinovici N, et al. Androgen receptor inhibitors in patients with nonmetastatic castration-resistant prostate cancer. *JAMA Netw Open*. 2024;7(8):e2429783. doi:10.1001/jamanetworkopen.2024.29783

**eMethods.** Data Source and Additional Statistical Methods

**eTable 1.** Discontinuation Rates Due to AEs in Clinical Trials and Observational Studies of the 3 ARIs

**eTable 2.** Frequency of All AEs and AEs of Special Interest

**eFigure 1.** Study Design

**eFigure 2.** Patient Attrition

**eFigure 3.** Hazard Ratio Estimates From Adjusted Cox Proportional Hazards Models for Time to Discontinuation of Initial ARI Treatment

**eFigure 4.** Hazard Ratio Estimates From Adjusted Cox Proportional Hazards Models for Time to Progression to mCRPC

**eFigure 5.** IPTW Sensitivity Analyses for (A) Time to Initial ARI Discontinuation and (B) Time to Progression to mCRPC

**eReferences.**

This supplementary material has been provided by the authors to give readers additional information about their work.

## **eMethods.** Data Source and Additional Statistical Methods

**Data Source.** Approximately 4,000 urologists from >700 urology group practices participate in the Precision Point Specialty (PPS) network, which corresponds to ≈80% of all US private community urologists. Additionally, the PPS network contains >35 electronic medical record, practice management, radiology-oncology, and dispensing systems from commercially insured patients, self-paid patients, and those with Medicare or Medicaid coverage, and has been frequently used in retrospective data analyses in the prostate cancer setting.<sup>1-3</sup>

### **Additional Statistical Methods**

Sensitivity analyses were performed using a propensity score–based inverse probability of treatment weighting (IPTW) method adjusting for: age group at index ( $\leq 74$ , 75-84,  $\geq 85$  years), race (White, Black/African American, other/unknown), insurance coverage (commercial, public), index period (2019-2020, 2021-2022), baseline prostate-specific antigen (PSA) group ( $< 2$ ,  $2 < 10$ ,  $\geq 10$  ng/mL), baseline PSA doubling time (PSADT) group ( $\leq 6$ ,  $> 6 < 10$ ,  $> 10$  months, missing), time from diagnosis of nmCRPC to index date (months), and Gleason score at initial prostate cancer diagnosis (4-7, 8-10, missing). A balance assessment was performed between the compared treatment cohorts calculating the absolute standardized mean difference (SMD) for each baseline characteristic, after propensity score weighting. Absolute SMD values  $< 0.2$  were considered indicative of a good balance of patient characteristics across treatment cohorts. Factors with  $SMD \geq 0.1$  were included as separate covariates in the IPTW model, in addition to the cohort variable.

**eTable 1.** Discontinuation Rates Due to AEs in Clinical Trials and Observational Studies of the 3 ARIs

|                                   | <b>Median follow-up (months)</b>         | <b>Darolutamide</b>    | <b>Enzalutamide</b>     | <b>Apalutamide</b>      |
|-----------------------------------|------------------------------------------|------------------------|-------------------------|-------------------------|
| <b>Clinical trials</b>            |                                          |                        |                         |                         |
| ARAMIS <sup>4</sup>               | 17.9                                     | 9% (vs 9% for placebo) | Not reported            | Not reported            |
| PROSPER <sup>5</sup>              | Enzalutamide: 18.5;<br>Placebo: 15.1     | Not reported           | 17% (vs 9% for placebo) | Not reported            |
| SPARTAN <sup>6</sup>              | 20.3                                     | Not reported           | Not reported            | 15% (vs 9% for placebo) |
| <b>Observational studies</b>      |                                          |                        |                         |                         |
| Hussain et al, 2022 <sup>7</sup>  | Enzalutamide: 12.0;<br>Apalutamide: 14.4 | Not reported           | 13%                     | 8%                      |
| Gangwish et al, 2023 <sup>8</sup> | 12.0                                     | 10%                    | 11%                     | 17%                     |
| DAROL <sup>9</sup>                | 14.8                                     | 6%                     | Not reported            | Not reported            |

AE, adverse event; ARI, androgen receptor inhibitor.

**eTable 2.** Frequency of All AEs and AEs of Special Interest

|                                    | <b>Darolutamide<br/>(n=362)</b> | <b>Enzalutamide<br/>(n=382)</b> | <b>Apalutamide<br/>(n=126)</b> |
|------------------------------------|---------------------------------|---------------------------------|--------------------------------|
| Any AE, <sup>a</sup> n (%)         | 90 (24.9)                       | 112 (29.3)                      | 38 (30.2)                      |
| AEs of special interest, n (%)     | 54 (14.9)                       | 67 (17.5)                       | 28 (22.2)                      |
| Fatigue                            | 41 (11.3)                       | 53 (13.9)                       | 14 (11.1)                      |
| Rash                               | 8 (2.2)                         | 3 (0.8)                         | 10 (7.9)                       |
| Cognitive and memory<br>impairment | 5 (1.4)                         | 8 (2.1)                         | 3 (2.4)                        |
| Fall                               | 3 (0.8)                         | 5 (1.3)                         | 1 (0.8)                        |
| Hypertension                       | 1 (0.3)                         | 3 (0.8)                         | 0                              |
| Fracture                           | 0                               | 0                               | 0                              |

AE, adverse event; ARI, androgen receptor inhibitor.

<sup>a</sup>AEs recorded during each ARI treatment and up to 30 days after discontinuation. Some patients experienced multiple AEs.

**eFigure 1. Study Design**

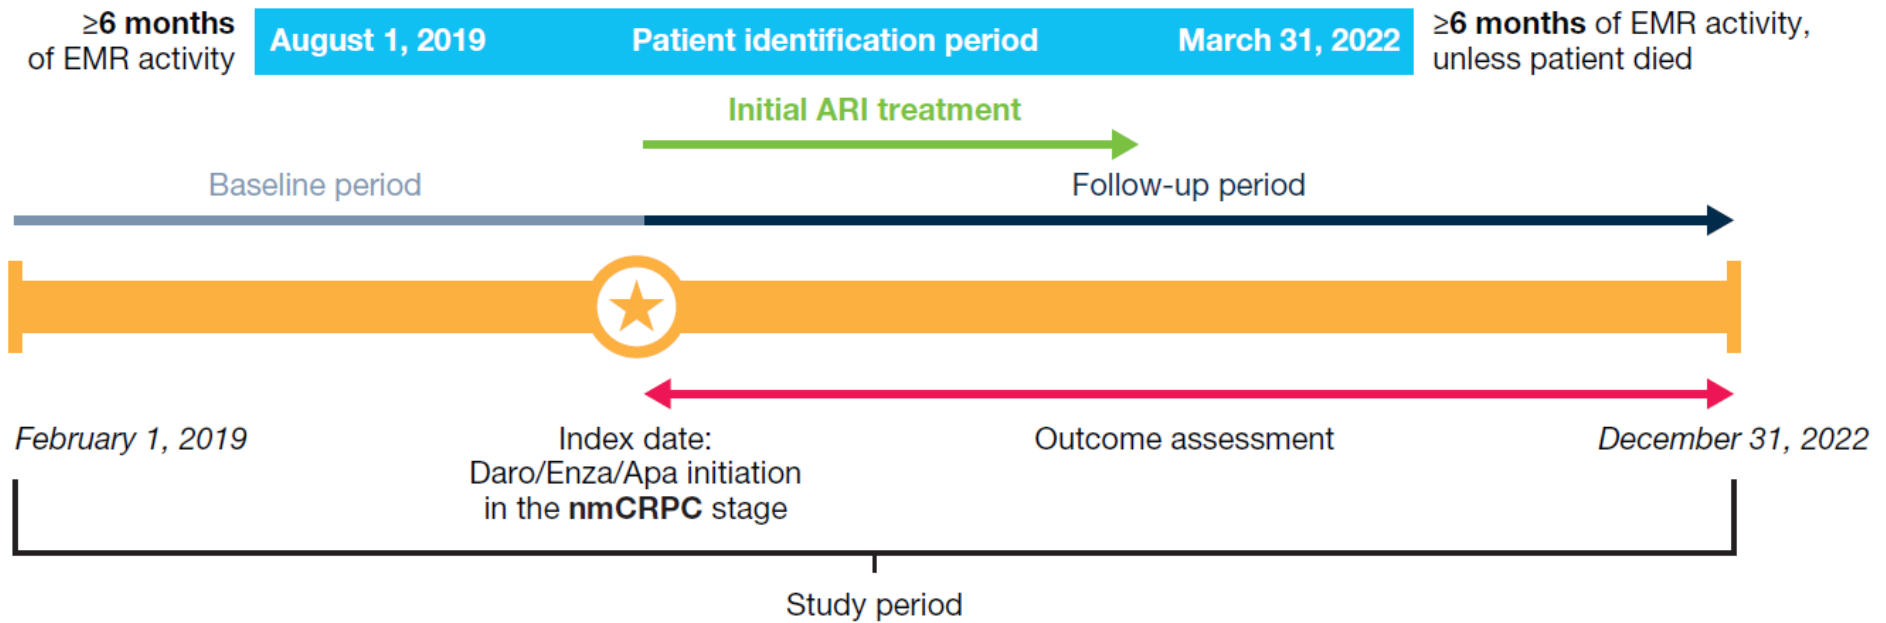

Apa, apalutamide; ARI, androgen receptor inhibitor; Daro, darolutamide; EMR, electronic medical record; Enza, enzalutamide; nmCRPC, nonmetastatic castration-resistant prostate cancer.

**eFigure 2. Patient Attrition**

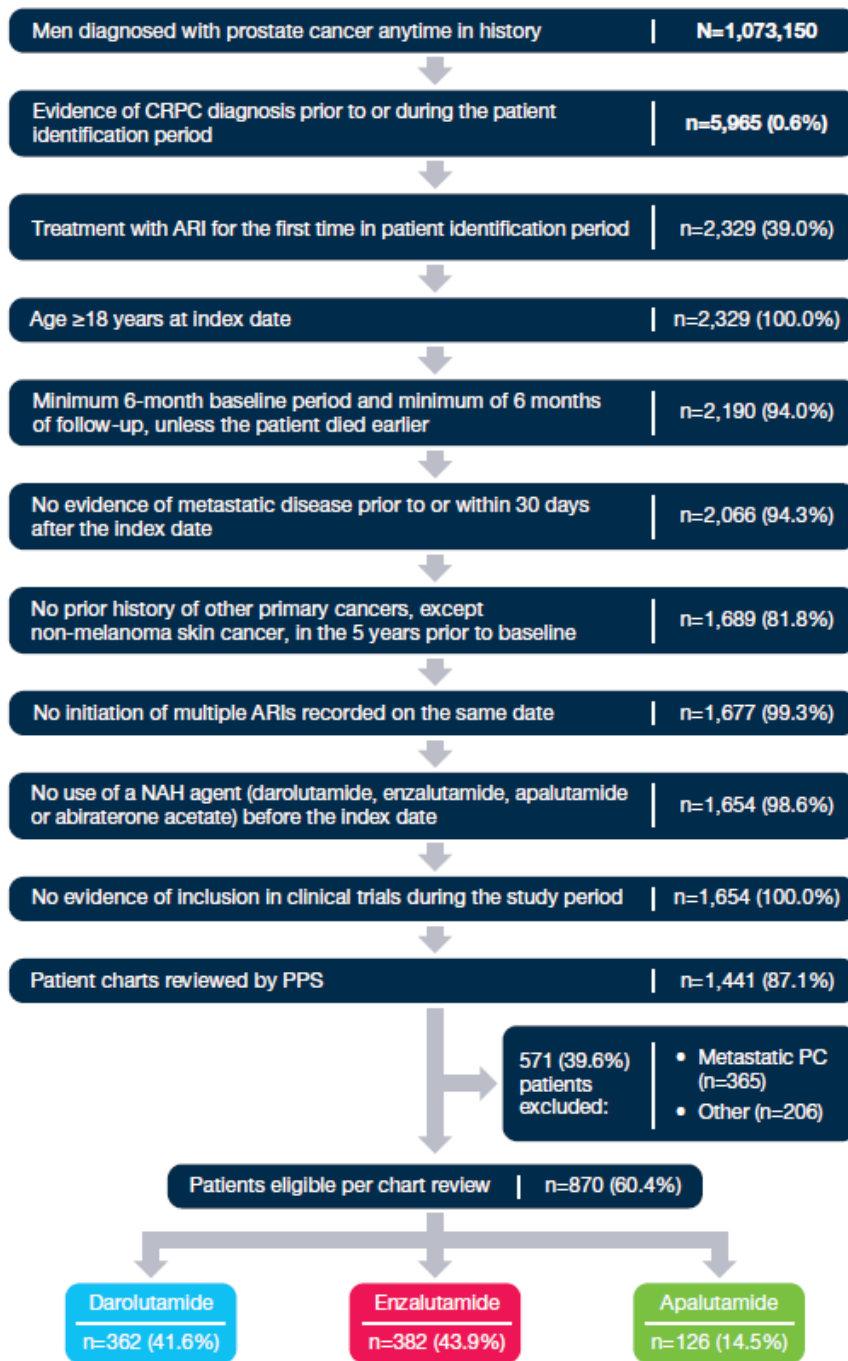

ARI, androgen receptor inhibitor; CRPC, castration-resistant prostate cancer; NAH, novel antihormonal therapy; PC, prostate cancer; PPS, Precision Point Specialty.

**eFigure 3.** Hazard Ratio Estimates From Adjusted Cox Proportional Hazards Models for Time to Discontinuation of Initial ARI Treatment

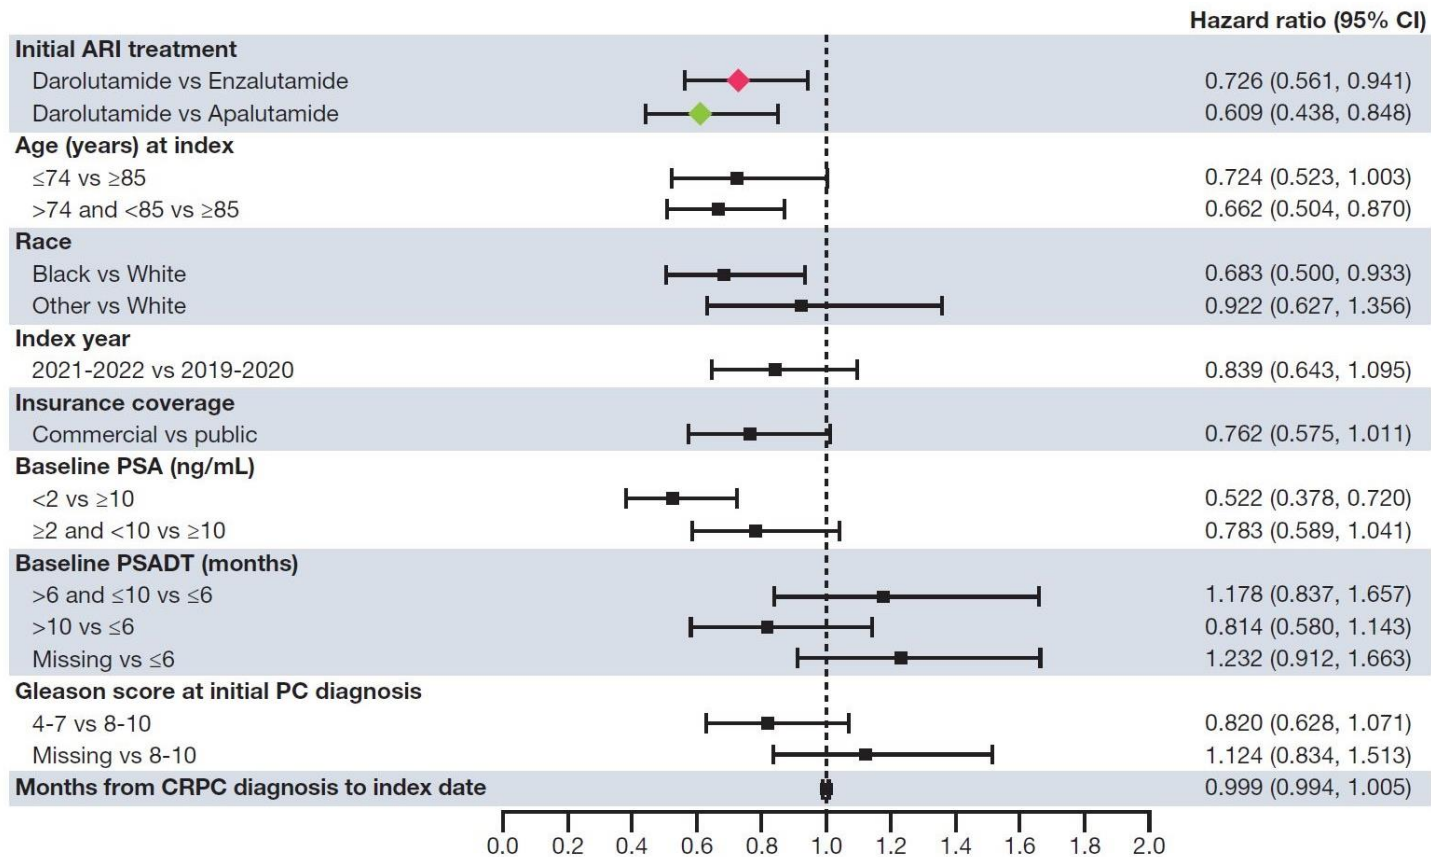

ARI, androgen receptor inhibitor; CI, confidence interval; CRPC, castration-resistant prostate cancer; PC, prostate cancer; PSA, prostate-specific antigen; PSADT, prostate-specific antigen doubling time.  
 Discontinuation of initial ARI treatment was defined as the earliest occurrence of stopping initial ARI treatment, switch to another ARI, or death.  
 A total of 791 patients (darolutamide, n=328; enzalutamide, n=341; apalutamide, n=122) were included in the Cox proportional hazards model after excluding 79 patients with unknown insurance coverage and/or missing baseline PSA values.

**eFigure 4.** Hazard Ratio Estimates From Adjusted Cox Proportional Hazards Models for Time to Progression to mCRPC

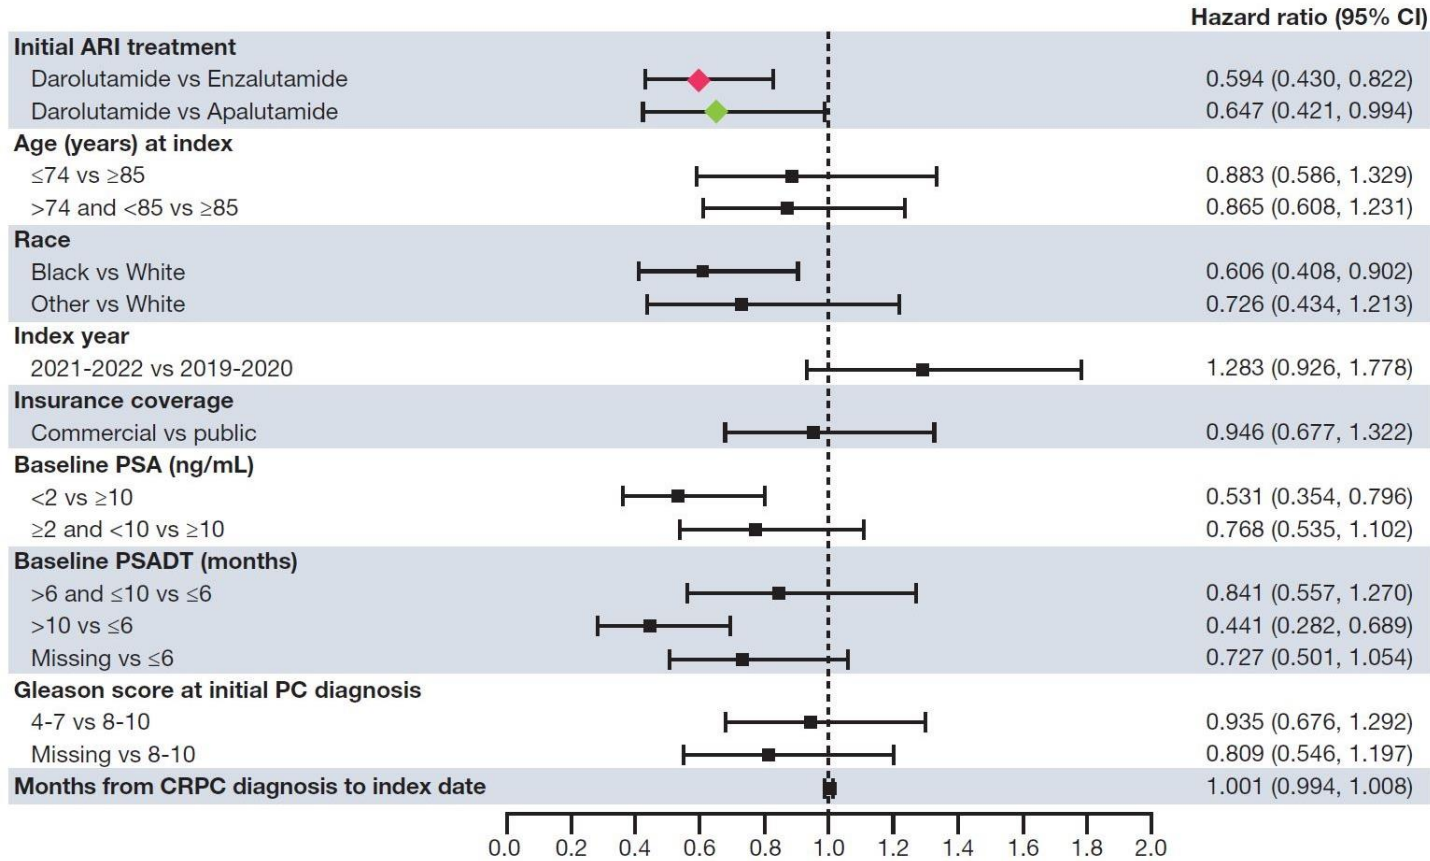

ARI, androgen receptor inhibitor; CI, confidence interval; CRPC, castration-resistant prostate cancer; mCRPC, metastatic castration-resistant prostate cancer; PSA, prostate-specific antigen; PSADT, prostate-specific antigen doubling time.  
 Progression to mCRPC was defined as the earliest occurrence of a clear diagnosis of mCRPC, evidence of metastasis in patient charts or radiology reports, or drug treatment initiated specifically for mCRPC (ie, abiraterone acetate, docetaxel, cabazitaxel, sipuleucel-T, mitoxantrone, radium-223).  
 A total of 791 patients (darolutamide, n=328; enzalutamide, n=341; apalutamide, n=122) were included in the Cox proportional hazards model after excluding 79 patients with unknown insurance coverage and/or missing baseline PSA values.



**eFigure 5.** IPTW Sensitivity Analyses for (A) Time to Initial ARI Discontinuation and (B) Time to Progression to mCRPC

**A.**

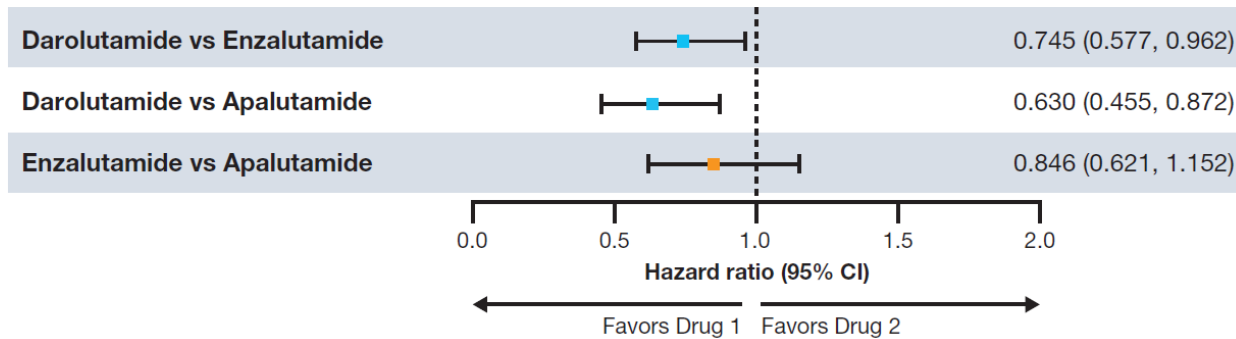

**B.**

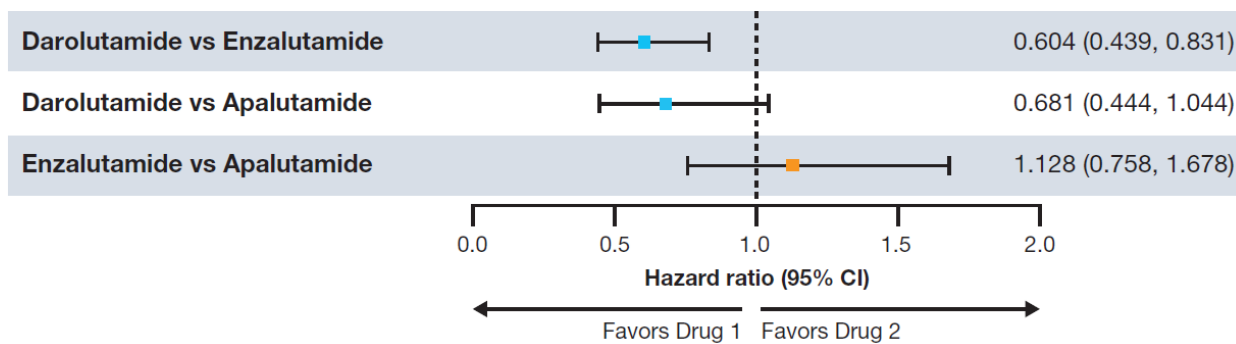

ARI, androgen receptor inhibitor; CI, confidence interval; IPTW, inverse probability of treatment weighting; mCRPC, metastatic castration-resistant prostate cancer; nmCRPC, nonmetastatic castration-resistant prostate cancer; PSA, prostate-specific antigen.

Discontinuation of initial ARI treatment was defined as the earliest occurrence of stopping initial ARI treatment, switch to another ARI, or death.

A total of 791 patients (darolutamide, n=328; enzalutamide, n=341; apalutamide, n=122) were included in the Cox proportional hazards model after excluding 79 patients with unknown insurance coverage and/or missing baseline PSA values.

The following covariates were used in the balance assessment: age group at index ( $\leq 74$ , 75-84,  $\geq 85$  years), race (White, Black/African American, other/unknown), insurance coverage (commercial, public), index period (2019-2020, 2021-2022), baseline PSA group ( $< 2$ ,  $2 < 10$ ,  $\geq 10$  ng/mL), baseline PSA doubling time group ( $\leq 6$ ,  $> 6 - \leq 10$ ,  $> 10$  months, missing), time from nmCRPC diagnosis to index date (months), and Gleason score at initial prostate cancer diagnosis (4-7, 8-10, missing).

Gleason score remained unbalanced after weighting and was therefore included as a separate covariate in the final IPTW mode.

## eReferences.

1. Lowentritt B, Brown G, Pilon D, et al. Real-world prostate-specific antigen response and treatment adherence of apalutamide in patients with non-metastatic castration-resistant prostate cancer. *Urology*. 2022;166:182-188.
2. Bivins VM, Durkin M, Khilfeh I, et al. Early prostate-specific antigen response among Black and non-Black patients with advanced prostate cancer treated with apalutamide. *Future Oncol*. 2022;18(32):3595-3607.
3. McKay RR, Gandhi R, Yang E, et al. Real-world combination therapy patterns in patients receiving leuprolide or relugolix for androgen deprivation therapy in 2021 (the REAL-ADT COMBO study): analysis from a US EMR database. *J Clin Oncol*. 2023;41(6;Suppl 74):74.
4. Fizazi K, Shore N, Tammela TL, et al. Darolutamide in nonmetastatic, castration resistant prostate cancer. *N Engl J Med*. 2019;380(13):1235-1246.
5. Hussain M, Fizazi K, Saad F, et al. Enzalutamide in men with nonmetastatic, castration-resistant prostate cancer. *N Engl J Med*. 2018;378(26):2465-2474.
6. Smith MR, Saad F, Chowdhury S, et al. Apalutamide treatment and metastasis-free survival in prostate cancer. *N Engl J Med*. 2018;378(15):1408-1418.
7. Hussain A, Jiang S, Varghese D, et al. Real-world burden of adverse events for apalutamide- or enzalutamide-treated non-metastatic castration-resistant prostate cancer patients in the United States. *BMC Cancer*. 2022;22(1):304.
8. Gangwish D, Zwaans BMM, Miriani P, et al. Prevalence and causes of discontinuation of androgen receptor inhibitors in advanced prostate cancer patients and analysis of physician management to increase duration of therapy. *Urology*. 2023;173:142-148.
9. Yu EY, Pieczonka CM, Suzuki H, et al. Darolutamide observational (DAROL) study in patients with nonmetastatic castration-resistant prostate cancer: second interim analysis. *J Clin Oncol*. 2023;41(16 suppl):e17095.
