# Supplementary material for: Androgen Receptor Inhibitors in Patients With Nonmetastatic Castration-Resistant Prostate Cancer
Source: PubMed Central journal article supplement — JAMA Netw Open. 2024 Aug 27;7(8):e2429783. doi: 10.1001/jamanetworkopen.2024.29783 (PMC11350483; doi:10.1001/jamanetworkopen.2024.29783), 2024-08-27
Supplement: jamanetwopen-e2429783-s002.pdf [file jamanetwopen-e2429783-s002.pdf]

## Data Sharing Statement

George. Androgen Receptor Inhibitors in Patients With Nonmetastatic Castration-Resistant Prostate Cancer. *JAMA Netw Open*. Published August 27, 2024.

doi:10.1001/jamanetworkopen.2024.29783

### Data

**Data available:** No

### Additional Information

**Explanation for why data not available:** The data that support the findings of this study are available from purchase from the Precision Point Specialty network of US urology practices.

Interested researchers can contact Precision Point Specialty Network

(<https://specialtynetworks.com>).
